# Supplementary material for: Perturbation of periodic spot-generation balance leads to diversified pigmentation patterning of harlequin Phalaenopsis orchids: in silico prediction
Source: Research Square preprint supplement (doi:10.21203/rs.3.rs-4274590/v1), 2024-04-25
Supplement: Supplementary file 1 [file 34c50ecc14c1e16fbea5fedc.pdf]

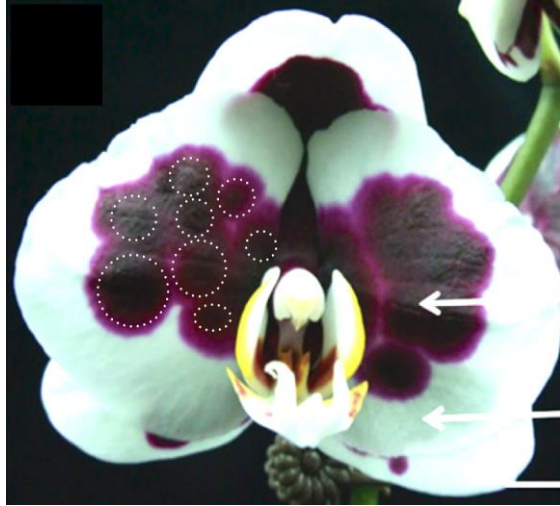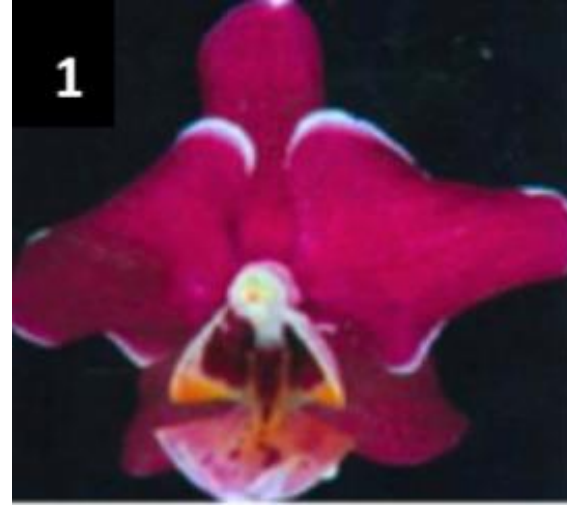

Lu *et al.*, Supplementary Figure 1. (A) *Phalaenopsis* Yushan Little Pearl. (B) *P.* Ever-spring Prince 'Plum'.

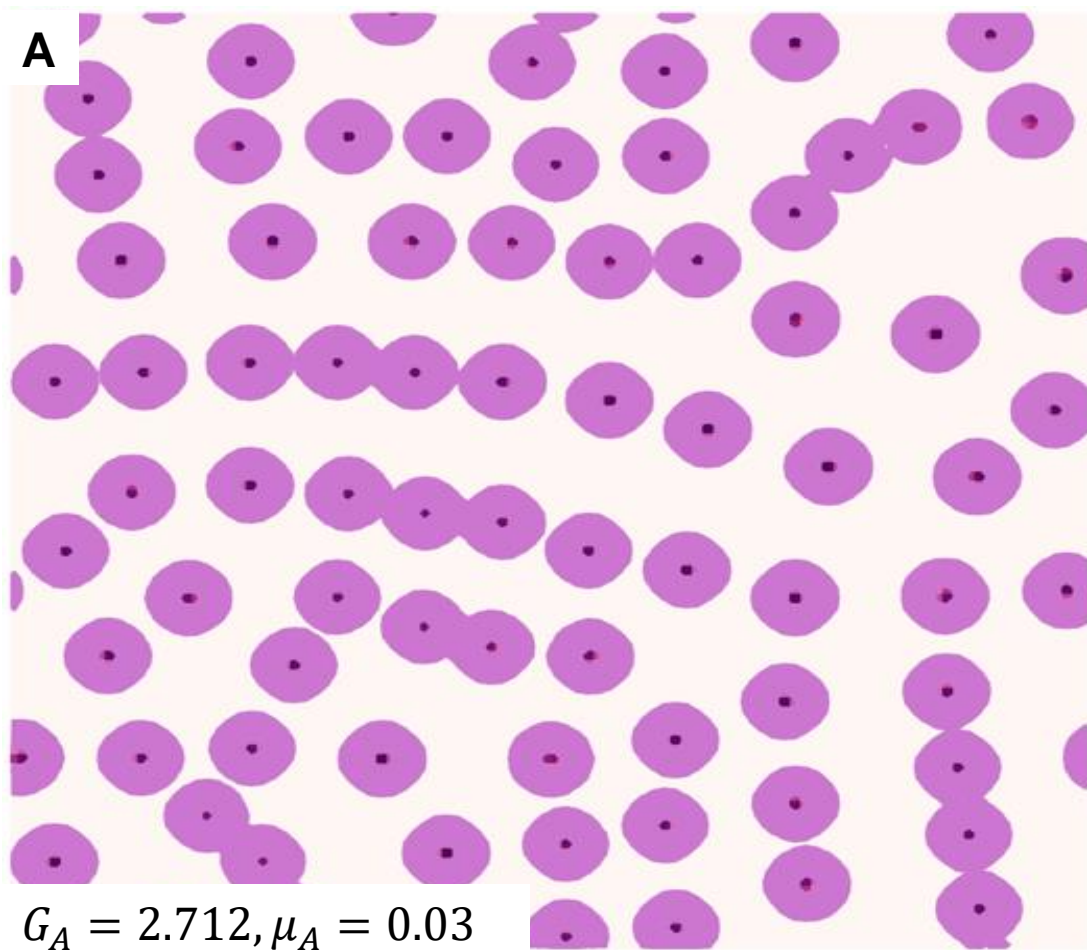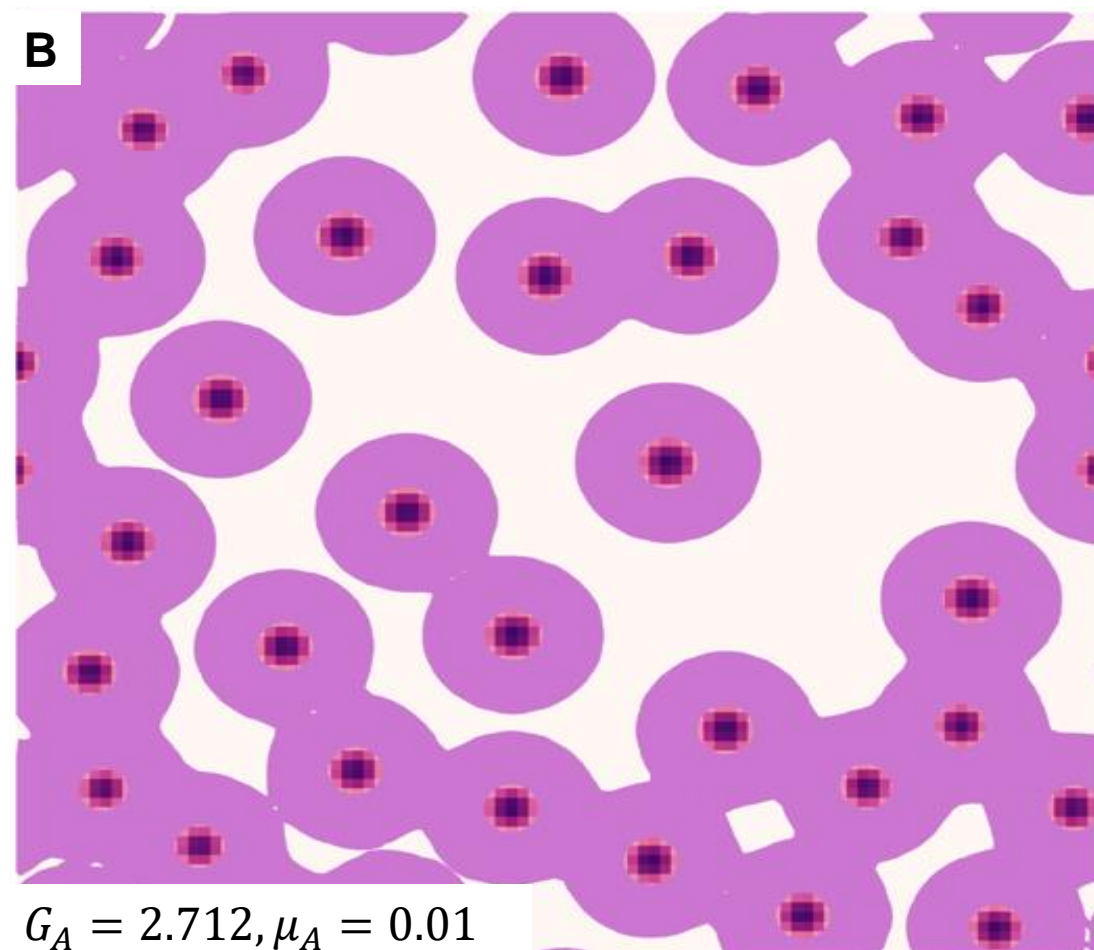

Lu *et al.*, Supplementary Figure 2

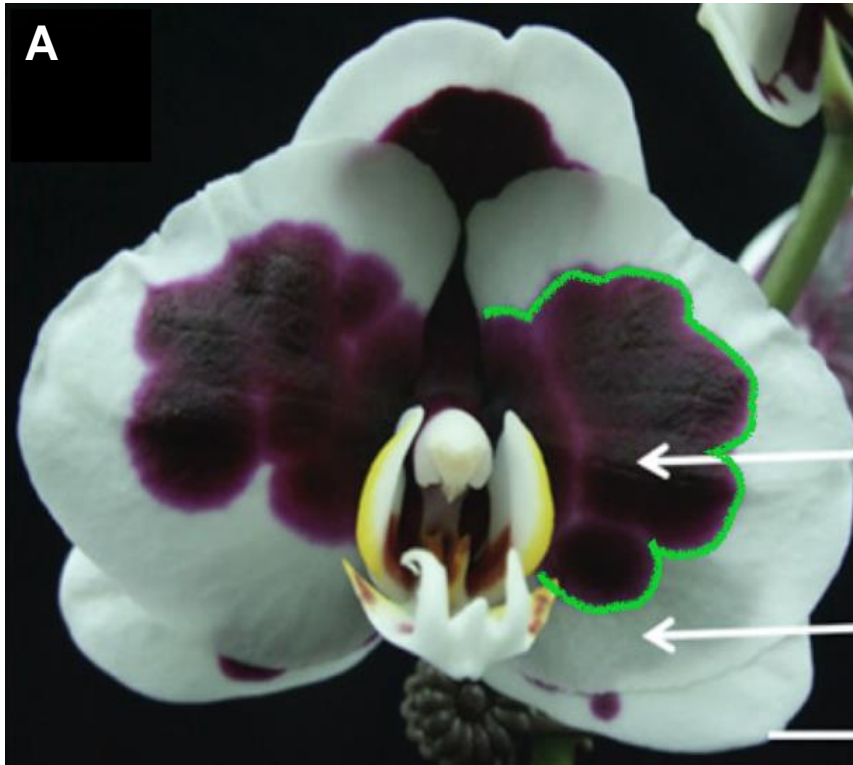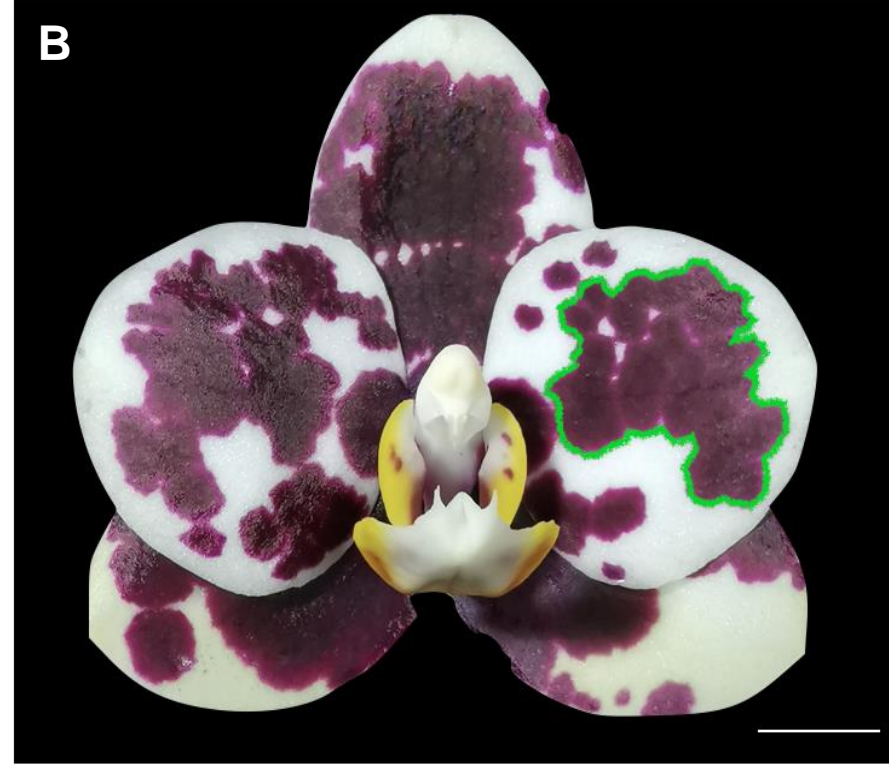

Lu *et al.*, Supplementary Figure 3

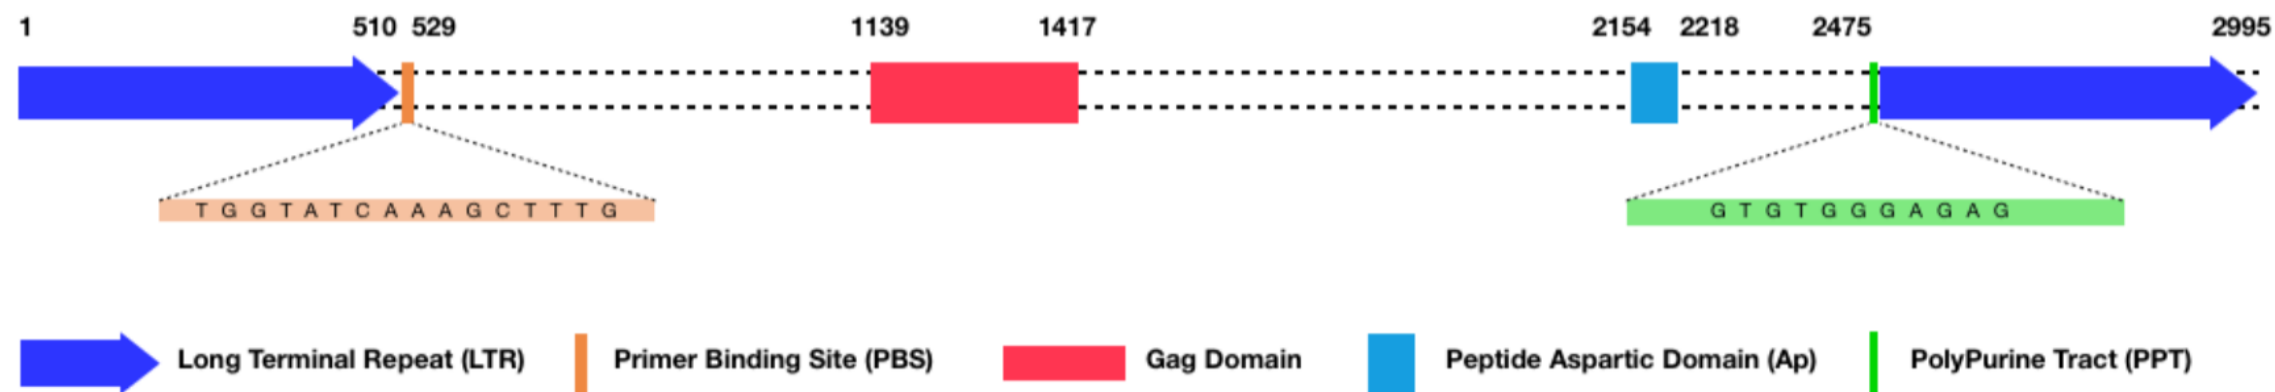

Lu *et al.*, Supplementary Figure 4



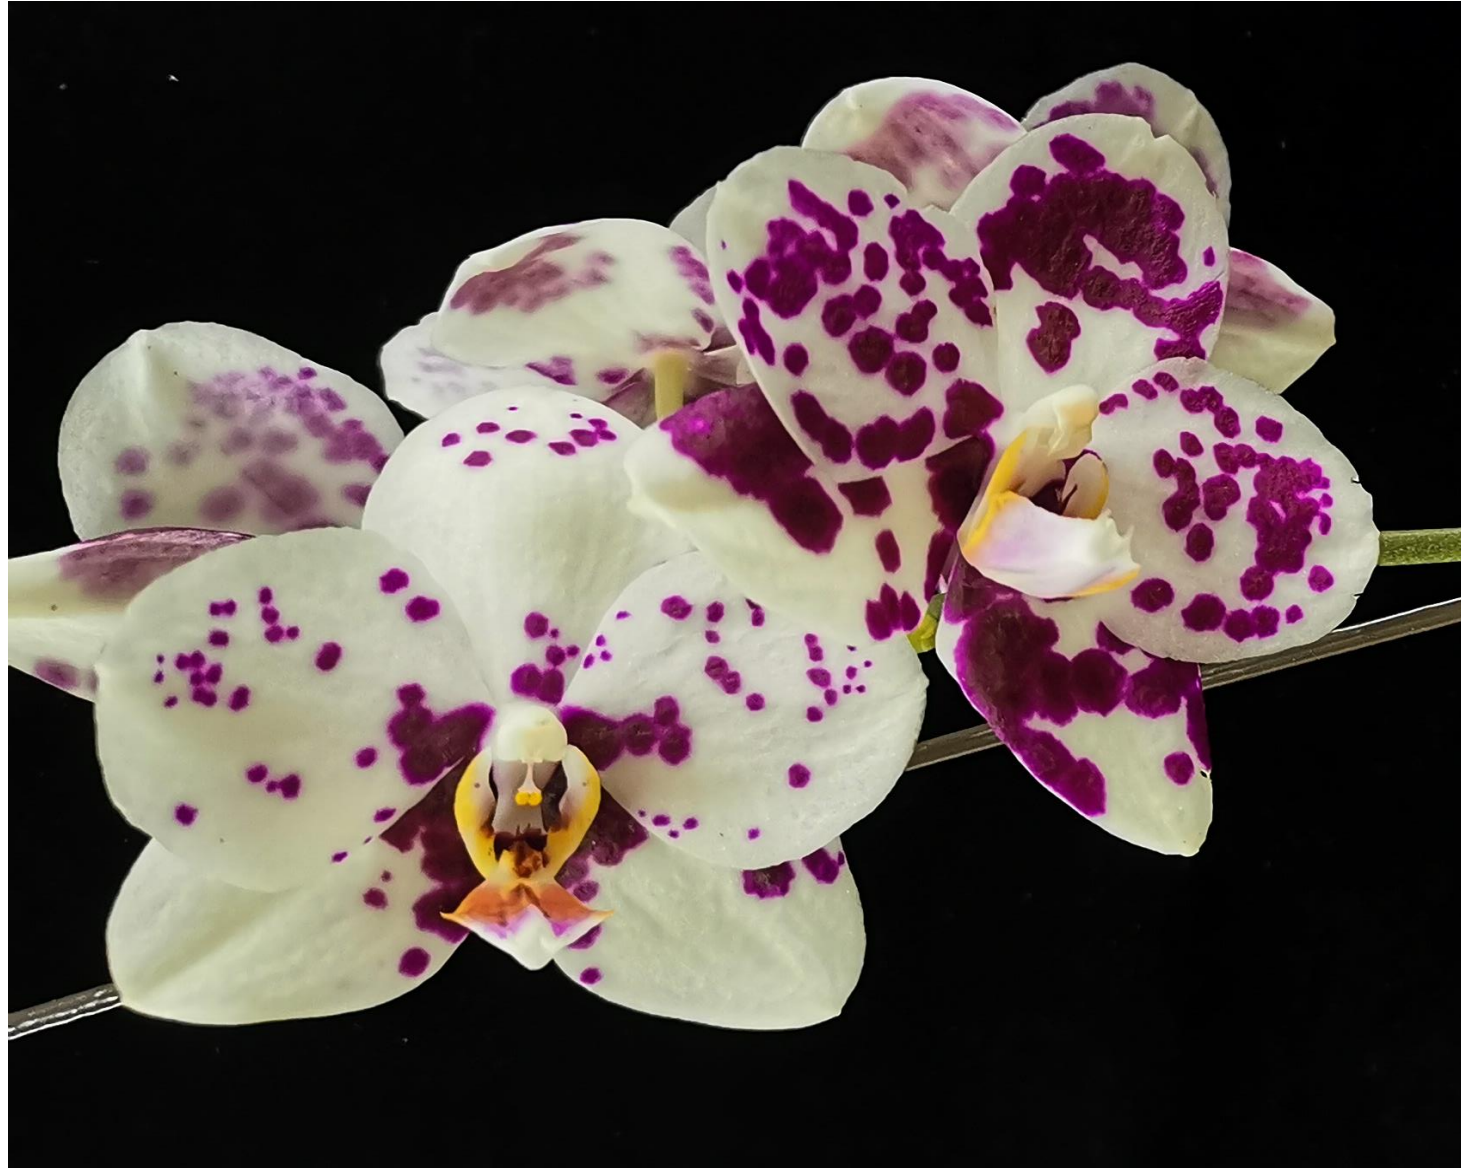

Lu *et al.*, Supplementary Figure 5
